# Supplementary material for: Expanding the genetic code of Mus musculus
Source: PubMed Central journal article supplement (PMC5321798; doi:10.1038/ncomms14568), 2017-02-21
Supplement: ncomms14568-s1.pdf [file ncomms14568-s1.pdf]

gacggatcgggagatcctccgatcccctatggtcgactctcagtaacaatctgctctgatgccgcatagtaagccagatctgctccctgctgtgtgtggcgcccaaaaccgca  
ctgtccggaaccccgggaatcaccgctgaacgagattagagctcattcagatctacatgatcaggttccctcagctctagaagatctcgggtgttctcctccacaagata  
tataaagccaagaatcgaatacttcaagttacggttaagcatatgatagctcattttaaacaataattttaaaactgcaaaactccaagaataattacttctacgtcagctattt  
gtactaatctttgtgttacagtcgaataatctcaattatctctaacacgcttgatctgataatgcaaatatgaaggaaatcagtggaatagccctctcctgcccagatctgtcc  
cgttgattttgtgtccaaaacaaactcccattgacgtcaatggggtggagacttggaaatcccgtgagtcacacccatccagcccattgatgtactgcaaaaccgcatcacc  
atgtaatagcagtagtaatacgttagatgtactgccaagtaggaaagtcaccataaggtcagtagctgggcataatgccaagcgggcccattaccgctcattgacgtcaatagggg  
gcgtacttgcatatgatacactgatgtactgccaagtgggcagttaccgtaataactccaccattgacgtcaatggaagtcctattggcgttactatggaacatacgtcatt  
attgacgtcaatggcgggggtctggggcggtcagccagcgggcccattaccgtaagttatgtaacggaactccatataatggcgtatgaactaatgaccctgaattgatta  
ctattaataactaggatccaagctacaacaaggcaaggcttgaccgagaattccgtgaggctccgggtgcccgtcagtgggcagagcgacatcgccacagtcccggagaagtg  
gggggaggggtcggcaattgaacgggtgctagagaagtgggcggggtaaacctgggaaagtgatgctgtactggtccgcttttccgaggggtgggggagaaccg  
tataaagtcagtagtccggtgaacgttcttttccgcaacgggttggcgcgagaacacaggttaagtgccgtgtgtgttcccggggctgaccttaccggttatggccct  
cgggtcctgaattacttccactggtccagtagctgattctgacccgaatttctggagcagggctggagcgggcttccgcttttagagagccccttggcaaaccttaccctgaactg  
gacctggcgctggggcggcgctgcaatctggtggcacttccgctgctctgctgcttccgataagctctagccattaaaattttgatgactgctgctgacgcttttttct  
ggcaagatagcttctgaatgctgggccaagatctgcaactggtattcgggttttggggcggcgggcgagcgggcccgtgctccagcgacatgttccgagagcg  
ggcctgagcggcgccacagaaatcggaacggggtgagctcaagctggcggcctgctggtgctggtccgcccggcgtgatcggcccctggggcggaaggt  
cccaacaacattgaaggttggcttcaactagcgaagatggcggcttccggcgggctggaggggctgaaggtgagagcgggcgtcgggagagcaccctggaacatgacc  
cacacaaggaaggggcttccgctcagccgctgctcagctcagctcaccaggtaccggggcgctccagcaccctgattagttggagctttggagctgggagctcgtctt  
aggttgggggggaggggtttatgctgaggttcccaactgagtggtggagactgaaagttagccagcttgcaactgatgtaattctctggaatttgcccttttgagtt  
tggatctgttctcctcaagcctcagacagtggttcaagtttttctccattcaggtgctgtaacacgggggtaccgcccacatggaagtaagggagaagaactttcac  
tcgccaacaactgaaggttggcttcaactagcagaccattcaacaataactcgaattggcggctgcttccagacaacactacccttgggacaaatgctcc  
actactggaataactctgctggccaaactgtcactacttctcttatggtgttcaatgcttccggtatccggatcataatgaaacggcatgacttttcaagagtgccatgccc  
cgaaggttatgacaggaacgcaactatcttcaagatgacgggaaactacaagacgctgctgaagtcaagttgaaaggtgataccctgttaactgctatcagtaaaaggtat  
tgattttaaagaagatggaacattctcggacaaaactcagtaacaactataactcacacaatgatacatcagcagcaaaaagaatggaatcaagcctaactcaaaa  
tcgccaacaactgaaggttggcttcaactagcagaccattcaacaataactcgaattggcggctgcttccagacaacactacccttgggacaaatgctcc  
ttcgaagatccaacgaaaagcgtgaccacatggtcctcttgagttgtaactgctgctgggattacacatggcatgagctctacaagactacaaggacgacgatgaca  
agtgagcggcctcagcagctagatgagggccctattctatagtgcaactaaatgctagagctcgtgatcagcctcagctgctcctctagttggccagcctatggtttgccc  
cctccccctgctccttgcacctggaaggtgacctcccactgctccttcaataaaatgaggaatgcatcgactgtctgagtaggtctcattctctggggggggggg  
tggcagcagcagaaggttggatgaaagattgggaagacaatagcaggtcagctggggctgggtggagagctatctcctgagcgggaaagacagcaactcaggtctggtg  
atccccacgcctcgtagcggcgatcaagcggcggtggtggttacgagcagcgtgaccctacacttccagcggcctagcggcctctcttctctctctctct  
tctcgcacgttccggccttcccgtaagctcaaatcgggcatccctttaggttccgattagcttaccgacactcagcccaaaaactctgattaggtgtaggttccac  
gtagtgggcatcggctgatagcgggttttccgcttggcgtggagtcacgttcttaatagtgagcttgttcaaacctggaacaactcaacctatctcgtctattctt  
tgaattataaggttctgcatcaggtattcggcctattggttaaaaaatgagctgatttaacaaaatgaaacgcaataatctgtggaatgctgctcagttaggtggaagctcc  
caggtccccagcagcagaagatgcaaacatgcatctcaatagtcagcaaccaggtggtggaagtcccccaggtccccagcagcagaagatgcaaacatgcatctca  
atagtcagcaacatagtcctccgcccctaacctccgcccctaacctccgcccaggtccgcccattccgcccctagctgactaatttttttattatgtagagggccagggc  
cgctctgctctgagctattccagaagtagtgaggaggttttggaggcctaggttttcaaaaactcccgggagctgtatatacattttggatctgatcaagagacaggy  
atgagcagcttctgcatcaggtattggaagattgggaagacaatagcaggtcagctggggctgggtggagagctatctcctgagcgggaaagacagcaactcaggtctggt  
gcccggctgttccgctgctcagcagggggcggcccgttcttttgaagaccgaccttccgggtgcccctgaatgaactgaggacgagggcagcggctatcgtggtgccc  
acgacgggcttcttccgagctgtgctgacggttgcactgaaagcgggaaagggactggctctattgggcaagtgccggggcaggaatcctctgcatctaccttgcctc  
ccgagaagatcatcatggtgatgcaatgcggtgctcagctgactgctgactcctgcccattcagccacaagcgaacatcagcagcagcagcagctactcggatg  
gagccggcttctgctcagcagctcagcgaagatggaagacatcagggcgtggaagctcagcagcagcagcagcagcagcagcagcagcagcagcagcagcagcagc  
gacctggtgagctcctgcttccgaatcatggtggaataagggcggcttcttggattcagactgtgcccggctgggtggtggcggaccctatcaggacatagcgttggcta  
cccgatattgctgaagagcttggcggcgaatggctgacccctcctcgtgcttaccggtatccggctcccgatcagcagcagcagcagcagcagcagcagcagcagc  
tgagcggactcgtgggttcaaatgaccgacgaagcagcgaacactgcatcagagattcagctcaccggcggcctctatgaaaggtgggctcggaaatgcttctccg  
tgaactcagcagcagcagcagcagcagcagcagcagcagcagcagcagcagcagcagcagcagcagcagcagcagcagcagcagcagcagcagcagcagcagc  
aaataaagcatttttctactgattctagttggttgcgaactcatcaatgctctatctatctgctgatacctgagcctctagctagagcttggcgtatcatggtcatagctg  
ttcctgtgaaattgtatccgctcaaatccacacaacatagcagcgggaagcataaaggtgaaagcctgggggtcctaatgagtgagctaacctcaataatgctgctc  
actgcccgttccagctgggaaactgctgctgagcagctcattgaatggcgaacggcgggagagggcgggttgcgtattggcgcttccgcttctcctgctcactgact  
gagcagcagcagcagcagcagcagcagcagcagcagcagcagcagcagcagcagcagcagcagcagcagcagcagcagcagcagcagcagcagcagcagcagc  
agcaaaagccaggaacggtaaaaagcggcgttcttcataggtccgcccctgacgagcagcagcaaaaactcagcagcagcagcagcagcagcagcagcagcagc  
caggactataaagatacagcggcttccctggaaagctccctgctgctcctgctccgacccctgctcagcagcagcagcagcagcagcagcagcagcagcagcagc  
tctcaatgctcagcgtgaggtatctcagttcgggtgaggtgctcagcagcagcagcagcagcagcagcagcagcagcagcagcagcagcagcagcagcagcagc  
tgaactcaacccggtaagcagcagcagcagcagcagcagcagcagcagcagcagcagcagcagcagcagcagcagcagcagcagcagcagcagcagcagcagc  
ctacggctacactagaagcagatttggatctgctgctgctggaagcaggtaccctcggaaaaagagttggtgagcttctgctcggcaaaaaccaccgctgtagcgggtg  
gtttttgttggcaagcagcagattacgcgcagaaaaaaggtatcaagaagatcttggatctttctacggggtctgacgctcagtggaacgaaaactcagcttaagggat  
gggtcatgagattcaaaaaggtatctcactagatcctttaaataaaaatgaagtttaaatcaatcaagtatataatgagtaaaactggctgacagttaccaatgcttaatcag  
gaggcactatctcagcagctctgctatttctgctcactatgctgctgactcccctgctgtagataactacgatacgggaggttaccatctggccccagctgctcaatgatacc  
ggagacccacgctcaccggctcagattatcagcaataaacccagcagcgggaagggcggagcagaaaggtgctgcaacttaccgctccatcagctctattaattgtg  
ccgggaagctagagtaagtagtccgcaatgaatgttgcgcaacgttggcattgctcagggatcagctggtgctcagcgtcgttgggtatgcttaccagctccgggtcc  
caacatcagaagcaggtacatgacccccatggtgcaaaaagcgggtgagctcctcggctcccgatcgtgtcagaagtaagttggccgaggttatcactcatggttatg  
cagcagctcaaatctcttactgctccctcagtagcttcttctgtagctcagctcaacaaagctcattctgagatgctgctcggcagcagcagcagcagcagcagcagc  
gctgcaatcagggataataccgcccacatagcagaactttaaagtctcatcttggaaaacgttctcggggcgaaaactcgaagatcttaccgctgtagagcagctc  
atgtaaccactcgtgacccaactgattctcagatcttcttacttccaccagcgttctggtgtagcaaaaacaggaagcgaatgcccgaaaaagggaaatagggcgacag  
gaaatgtgaataactcactctcttctcaatatttagaagcatttatcagggtattgctcagcagcagcagcagcagcagcagcagcagcagcagcagcagcagcagc  
cgcaatttccccgaaaagtgccacctgacgtc

Supplementary Figure 2. Sequence of pGFPamber-tRNA plasmid.

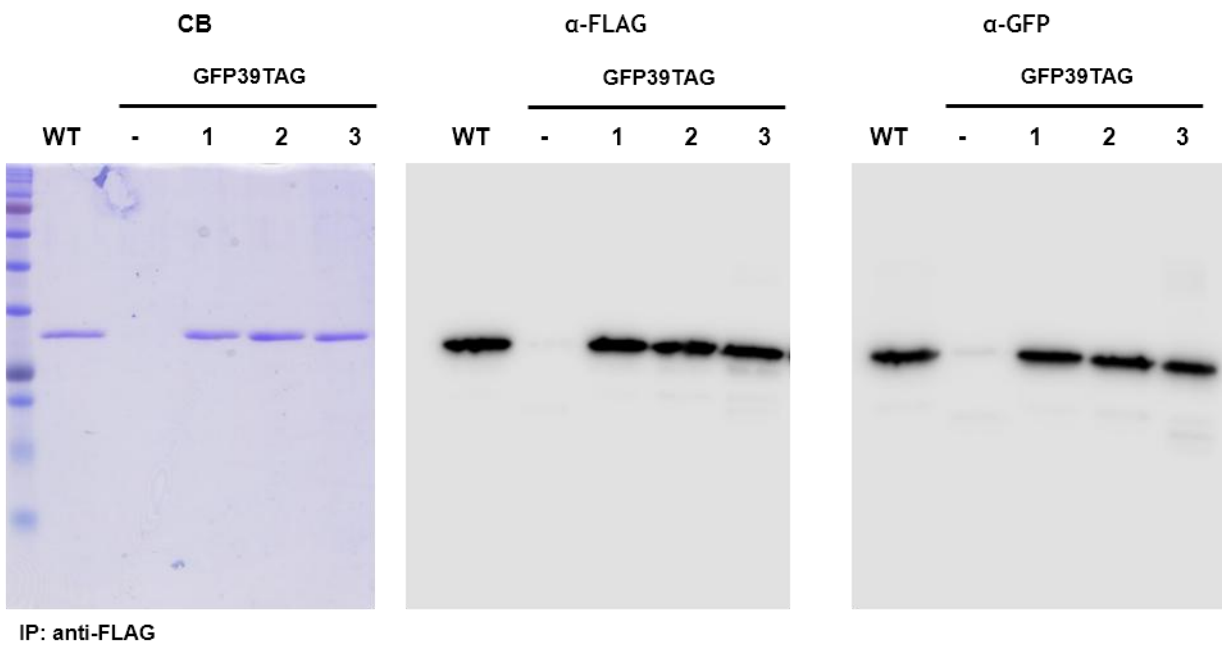

**Supplementary Figure 3.** Uncropped Western blot images for Figure 1d.

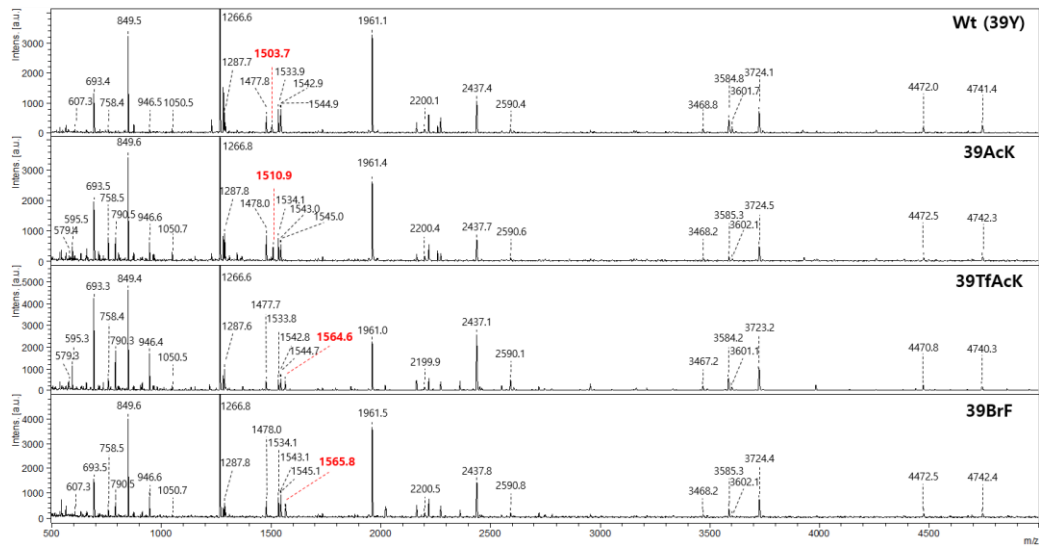

| Residues     | Peptide sequence                              | Expected mass [M+H] <sup>+</sup> | Measured mass [M+H] <sup>+</sup> |               |               |               |
|--------------|-----------------------------------------------|----------------------------------|----------------------------------|---------------|---------------|---------------|
|              |                                               |                                  | Wt(39Y)                          | 39AcK         | 39TfAcK       | 39BrF         |
| 1-4          | MASK                                          | 436.2                            | -                                | -             | -             | -             |
| 5-27         | GEELFTGVVPIVLVDGVDVNGHK                       | 2437.3                           | 2437.4                           | 2437.7        | 2437.1        | 2437.8        |
| <b>28-42</b> | <b>FVSVGEGEGDATY GK</b>                       | <b>1503.7</b>                    | <b>1503.7</b>                    | <b>1510.9</b> | <b>1564.6</b> | <b>1565.8</b> |
| 43-74        | LTLKFICTTGKLPVWPVPTLVTTFSYGVQCFSR             | 3603.9                           | 3601.7                           | 3602.1        | 3601.1        | 3602.1        |
| 75-80        | YPDHMK                                        | 790.4                            | ND                               | 790.5         | 790.3         | 790.5         |
| 75-81        | YPDHMKR                                       | 946.5                            | 946.5                            | 946.6         | 946.4         | 946.6         |
| 81-86        | RHDFK                                         | 849.4                            | 849.5                            | 849.6         | 849.4         | 849.6         |
| 82-86        | HDFK                                          | 693.3                            | 693.4                            | 693.5         | 693.3         | 693.5         |
| 87-97        | SAMPEGYVQER                                   | 1266.6                           | 1266.6                           | 1266.8        | 1266.6        | 1266.8        |
| 98-102       | TISFK                                         | 595.3                            | ND                               | 595.5         | 595.3         | ND            |
| 98-108       | TISFKDDGNYK                                   | 1287.6                           | 1287.7                           | 1287.8        | 1287.6        | 1287.8        |
| 98-110       | TISFKDDGNYKTR                                 | 1544.8                           | 1544.9                           | 1545.0        | 1544.7        | 1545.1        |
| 111-123      | AEVKFEGDTLVNR                                 | 1477.8                           | 1477.8                           | 1478.0        | 1477.7        | 1478.0        |
| 111-127      | AEVKFEGDTLVNRIELK                             | 1961.1                           | 1961.1                           | 1961.4        | 1961.0        | 1961.5        |
| 115-123      | FEVDTLVNR                                     | 1050.5                           | 1050.5                           | 1050.7        | 1050.5        | 1050.7        |
| 115-127      | FEVDTLVNRIELK                                 | 1533.8                           | 1533.9                           | 1534.1        | 1533.8        | 1534.1        |
| 128-132      | GIDFK                                         | 579.3                            | ND                               | 579.4         | 579.3         | ND            |
| 128-141      | GIDFKEDGNILGHK                                | 1542.8                           | 1542.9                           | 1543.0        | 1542.8        | 1543.1        |
| 128-157      | GIDFKEDGNILGHKLEYNYN SHNVYITADK               | 3467.7                           | 3468.8                           | 3468.2        | 3467.2        | 3468.2        |
| 128-159      | GIDFKEDGNILGHKLEYNYN SHNVYITADKQK             | 3723.8                           | 3724.1                           | 3724.5        | 3723.2        | 3724.4        |
| 142-159      | LEYNYN SHNVYITADKQK                           | 2200.1                           | 2200.1                           | 2200.4        | 2199.9        | 2200.5        |
| 160-163      | NGIK                                          | 431.3                            | -                                | -             | -             | -             |
| 164-167      | ANFK                                          | 479.3                            | -                                | -             | -             | -             |
| 168-210      | IRHNIEDGSVQLADHYQQNT PIGDGPVLLPDNHYLSTQSA LSK | 4741.4                           | 4741.4                           | 4742.3        | 4740.3        | 4742.4        |
| 170-210      | IRHNIEDGSVQLADHYQQNTPIGDGPVLLPDNHYLSTQSALS K  | 4472.2                           | 4472.0                           | 4472.5        | 4470.8        | 4472.5        |
| 211-215      | DPNEK                                         | 602.3                            | ND                               | ND            | ND            | ND            |
| 211-216      | DPNEKR                                        | 758.4                            | 758.4                            | 758.5         | 758.4         | 758.5         |
| 216-216      | R                                             | 175.1                            | -                                | -             | -             | -             |
| 217-239      | DHMLLEFVTAAGITHGMDE LYK                       | 2590.3                           | 2590.4                           | 2590.6        | 2590.1        | 2590.8        |
| 217-247      | DHMLLEFVTAAGITHGMDELYKDYKDDDDK                | 3584.7                           | 3584.8                           | 3585.3        | 3584.2        | 3585.3        |
| 243-247      | DDDDK                                         | 607.2                            | 607.3                            | ND            | ND            | 607.3         |

**Supplementary Figure 4.** Mass spectrum of in-gel trypsin digestion of GFPuv wild-type (Wt) and mutants carrying UAAs at position 39 (39AcK, 39TfAcK, and 39BrF). Each peak in the spectrum (top) represents a tryptic peptide (bottom). Mass spectra were identical among GFPuv samples except peptide fragment (28-42) carrying UAAs. The tryptic peptide carrying UAAs and corresponding peaks are indicated.

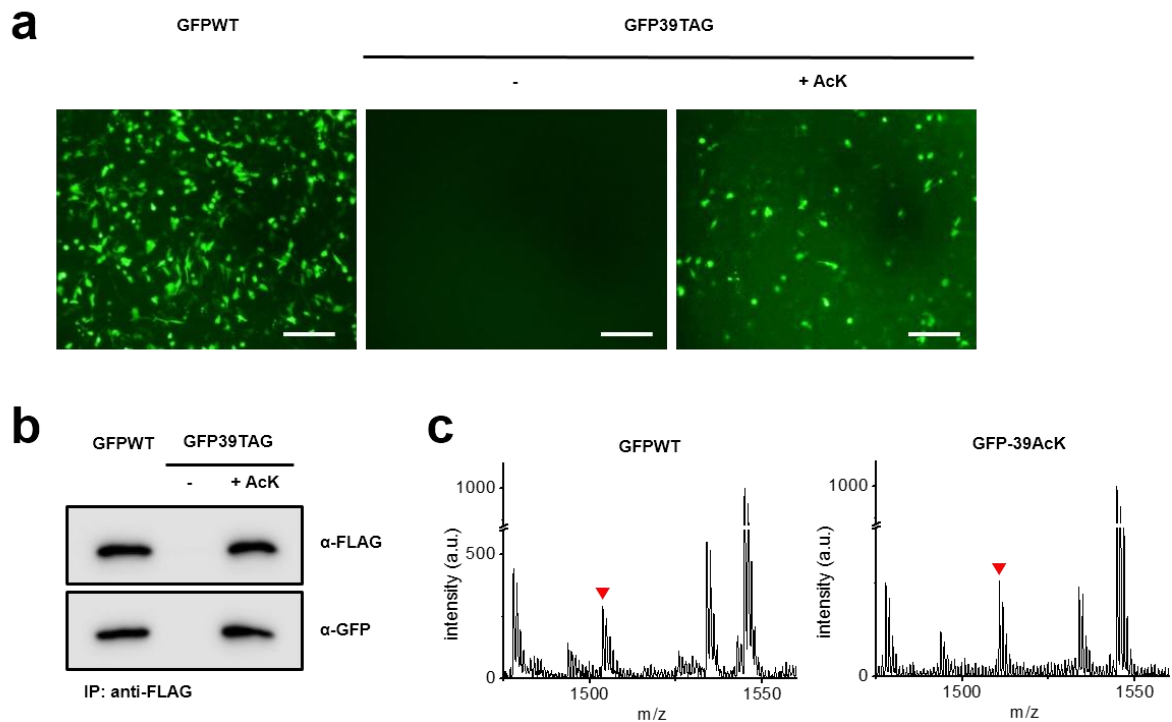

**Supplementary Figure 5.** Site-specific incorporation of AcK in NIH3T3 mouse cells. **(a)** Fluorescence image of NIH3T3 cells transfected with DNA constructs for AcK incorporation in the presence or absence of AcK. Scale bar, 200 $\mu$ m. **(b)** Western blot analysis using antibodies specific for FLAG-tag and GFPuv. For immunoblotting, proteins in the lysates of the transfected cells were pulled down with antibody against FLAG-tag and resolved by SDS-PAGE. **(c)** MALDI-TOF MS analysis of wild type GFPuv (GFPWT) and AcK-incorporated GFPuv (GFP-39AcK) after trypsin digestion. The peak corresponding to the tryptic peptide carrying Y39 of GFPWT or AcK39 of GFP-39AcK is indicated (arrowhead). The mass of Y39-containing tryptic peptide is 1,503.8 Da (calculated mass; 1,503.7 Da). The detected mass of AcK39-carrying tryptic peptide is 1,510.7 Da (expected mass; 1,510.7 Da).

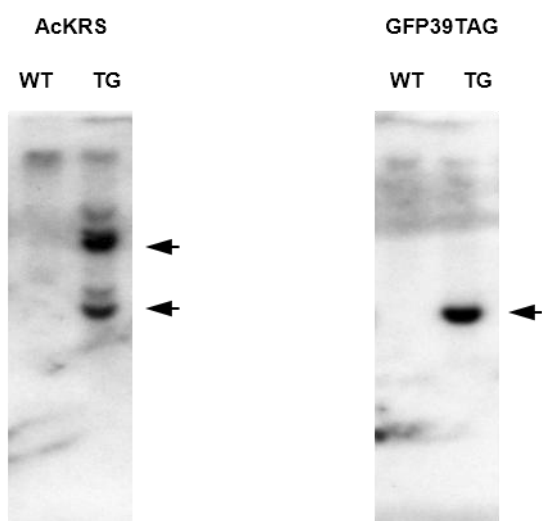

**Supplementary Figure 6.** Uncropped Southern blot images for Figure 2a.



**a** AcKRS cDNA

```

ATGTAATCCATATGATGTTCCAGATTATGCTATGGATAAAAAACCACTAAACACTCTGATATCCGCAACCGGG
CTCTGGATGTCAGGACCGGACCAATTCATAAAATAAAACACCGAAGTCTCTCGAAGCAAATCTATATT
GAAATGGCATCGGAGCCCACTTTGTTAAACAACCTCCAGGACGACAGGACTGCAAGAGCGCTCAGGAC
CACAAATACAGGAAGACTGCAAAAGCTGCAAGGTTTCGGATGAGGATCTCAATAAGTCTCCACAAAGGCA
AACGAGACACGACAGCTGAAAGTCAAGGTCGTTTCTGCCCTACCAGAACGAAAGGCAATGCCAAAA
TCGGTTGCGAGAGCCCGAAACCTCTTGAGAATACAGAAGCGGCACAGGCTCAACCTCTGGATCTAAATTT
TCACCTCGCATACCGGTTCCACCCCAAGAGTCAAGTTCTGTCGGGCACTGTTTCAACATCAATATCAAGC
ATTTCTACAGGCACTGCATCCGCACTGGTAAAGGGAATACGAATCCCATACATCCATGCTGCCCTCT
GTTGAGGAGTCCCGCCCACTACGAAAGAACAGACTGACAGGCTTGAAGTCTGTTAAACCCAAAGAT
GAGATTTCCCTGAATCCGCAAGCTTTGAGGAGCTTGAATCCGAATGCTCTCGCAGAAAAAAGAC
CTGACGACATCTACGCGAAGGGAATATCTGAGGAACTCGAGGCTGAAATACAGGTTCTTIT
GTGACAGGGGTTTCTGAAATAAATCCCGATCTGATCCCTCTGATATACGAAAGATGGCAAT
GATAATGATACCGAATTTCAAACAGATCTTCAGGTTGACAAAGACTCTGCTGAGACCCATGATGGCT
CCAAACCTCTGAACTACGCGGCAAGCTTGACAGGSCCTGCTGATCAATAAAAAATTTTGAATAGGC
AcKRS primer1
CCATCTCAGAAAAAGTCCGACGGCAAGAACACCTCGAAGAGTTTACCATGCTGACTCTCTCCAGATG
GATCGGGATGCACCGGAAAAATCTGAAAGCATAAATACGCACTCTGTAACACCTGGGAATGATTTTC
AAGATCGTAGGCGATTCCTGCATGGTCTATGGGATACCTTGATGTAATGACAGGAGACTGGAACTTTCC
TCTGAGTAGTCCGACCCATACCGCTTGACCGGATGGGGTATGATAAACCTCGATAGGGCAGGTTTC
GGCTCGAAGCCCTTCAAAGGTTAAACACGACTTAAAAATCAAGAGAGCTCAAGGTCGAGCTCTTAC
TATACGGGATTTCTACCAACCTTGAGCGCGCTCGAGCATGCATCTAGAGGGCCCTATTCTATAGTGTG
ACCTAAATGCTAGAGCTCGTATCAGGCTCGACTGCTCTAGTTGCCAGCCTCTGTTGTTGCCCTC
AcKRS primer2
CCCCGGTG

```

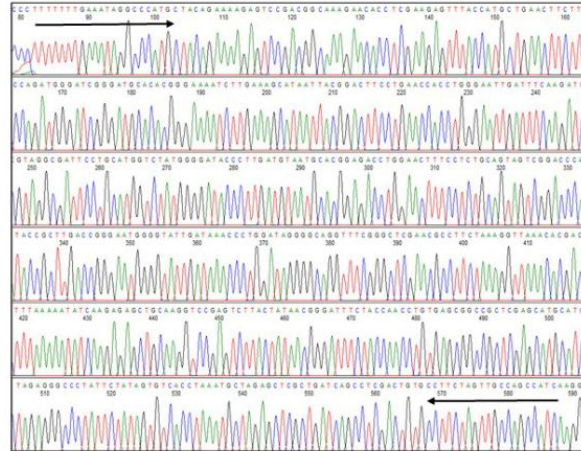

**b** GFPamber cDNA

```

GATCTGCCCCGTGATTTTGGTCCAAAACAACTCCCATTTGACSTCAATGGSGTGSAGACTTGGAAATCCC
GFPamber primer1
GGTGAATCAACCGCTATCCACGCCCATTTGATGACTGCCAAAACCGCATCACCATGGTAATAGCGATGACT
AATACGTAGATGACTGCCAAGTAGGAAAGTCCCAAGGTGATGACTGGGCATAATGCCAGGGGGGCAT
TTACCGTCAATGACGTCAATAGGGGGCGTACTTGGCATATGATACACTTGTATCTGCCAAGTGGCAGTT
TACCGTAAATCTCACCCATTGACGTCAATGGAAAGTCCCTTATGGCGTACTATGGGAACATAGCTCAAT
ATTGACGTCAATGGGCGGGGTGTTGGGCGGTGACGACGGCGGCATTTACCGTAAGTTATGAAAGCGG
AATCCATATATGGGCTATGAACTAATGACCCCGTAAATGATTAATTAAGTAGGATCCAGGCTACAA
GFPamber primer2
CAAGGCAAGGCTTGACCGAGAATCCGTGAGGCTCCGGTCCCGCTCAGTGGGCGAGACCCACATCCGCCACA
GTCCCCGAGAAGTGGGGGAGGGTGGCAATGAAACCGGTGCTAGAGAAGTGGGCGGGTAAACTGG
GAAAGTGATGCTGTACTGGCTCCGCCCTTTTCCGAGGGTGGGGGAGAACCGTATATAAGTGCAGTAGTC
CCGTGAACGTTCTTTTCGCAACGGGTTGCCGCCAGAACACAGGTAAGTCCCGTGTGGTTCCCGCGGG
CTGGCCTCTTTACGGGTTATGGCCCTTGGTGGCTGAATTAATCCACCTGGCTCCAGTACGTTGATCTT
GATCCCGAGCTGGAGCGGGGGGGGCTTGGGCTTTAGAGGCCCTTCCGCTCGTCTGATGATGAGGCTT
GGCTGGCGCTGGGCGCCGCGTGGAAATCTGGTGGCACTTCCGCGCTGTCTCGTGCITTCGATAAAT
CTTAGCCATTTAAAAATTTTIGATGACCTGCTGCGACGCTTTTTTCTGGCAAGTATGCTTGTAAATGCGG
GCCAGGATCGCACTGATTTTGGTTTTTGGGSCCGGGCGGACGGGCGGCTCCCGCCAGCCCA
CATGTTCCGCGAGGCGGGGCTGGAGCGCGGCCACCGAGAATCGGACGGGGTAGTCTCAAGTGGCGGGC
CTGCTCTGGTCCCTGGCTCGGCGCGCGGTATCGCCCCGCTGGGCGGCAAGGCTGGCCGGTGGCGAC
CAGTTGCGTGAAGGAAAGTGGCGCTTCCCGGCCCTCCAGGGGGCTCAAATGGAGGACGCGGGCT
CGGAGAGCGGGCGGTGAGTCAACCAACAAJAGGAAGGGGCTTTCCGCTCCAGCGCTCGCTCATGTG
ACTCCAGGATACCGGGCGGCTCCAGGCACTCAATAGTCTGGAGCTTTGGAGTACGCTGCTTTAG
GTTGGGGGAGGGTTTTATCGGATGGATTTCCCCACACTGAGTGGTGGAGACTGAAGTTAGGCCAGCTT
GGCACTGATGTAATCTCCTTGGAAATGGCCCTTTTGGATTTGATCTTGGTTCATCTCAAGGCTCAGA

```

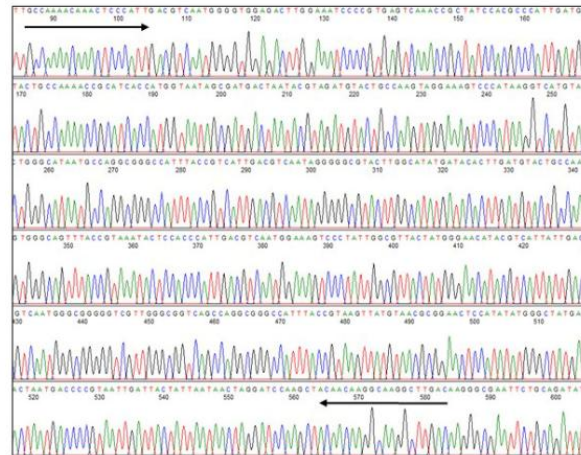

**Supplementary Figure 7.** Validation of genomic insertion of transgenes. Genomic DNA was isolated from the tail of AcK-GFPamber mouse and gene fragments of AcKRS and GFPamber were amplified by PCR. PCR products were cloned into TA vector (Invitrogen) and subject to sequence analysis. Sequences of AcKRS (a) and GFPamber (b) were correctly identified.

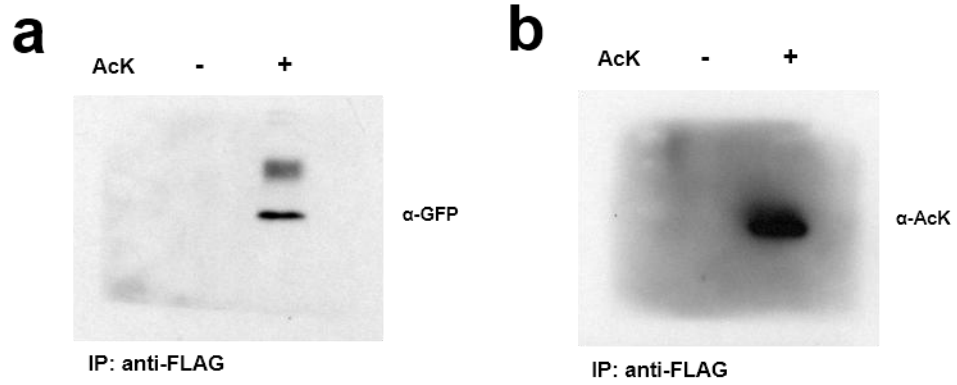

**Supplementary Figure 8.** Uncropped Western blot images for Figure 2d.



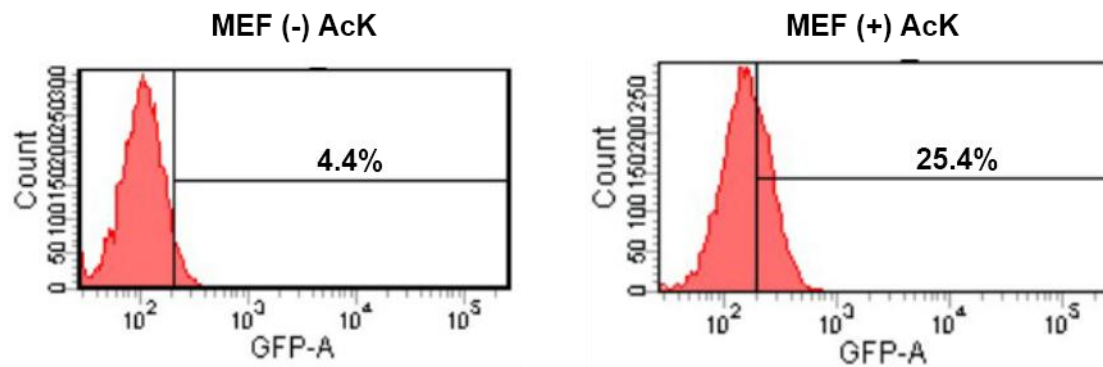

**Supplementary Figure 9.** Flow cytometric analysis for acetylated GFP expression in the MEF cells. The MEF cells were cultured in the presence or absence of 10 mM AcK and GFPuv expression was analyzed using flow cytometry. GFPuv-positive cells have increased from 4.4% up to 25.4% by the presence of AcK.

**a**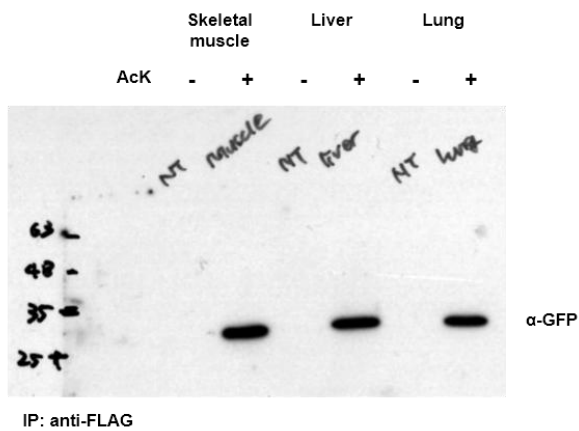**b**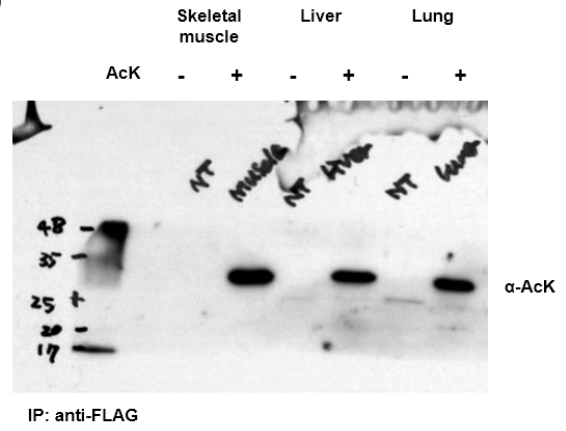

Supplementary Figure 10. Uncropped Western blot images for Figure 4b.

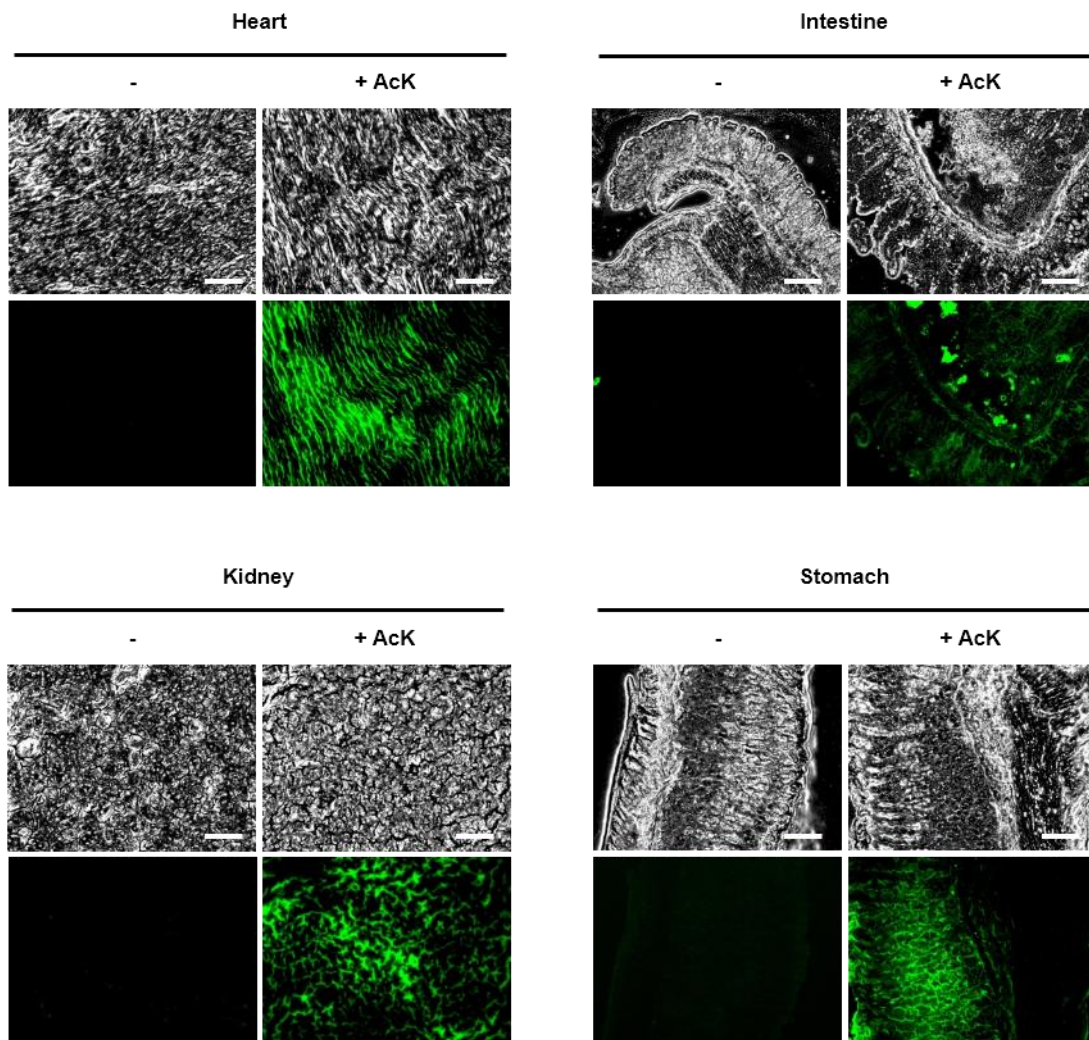

**Supplementary Figure 11.** Fluorescence image of tissues from AcK-GFPamber double transgenic mouse fed with AcK. Tissues from transgenic mice were frozen, cryo-sectioned, and analyzed on fluorescence microscope. The expression of GFPuv in tissues, heart, intestine, kidney, and stomach was detected only after AcK injection, demonstrating temporal expression of acetylated GFPuv in various tissues of the AcK-GFPamber mouse. Scale bar, 200 $\mu$ m.

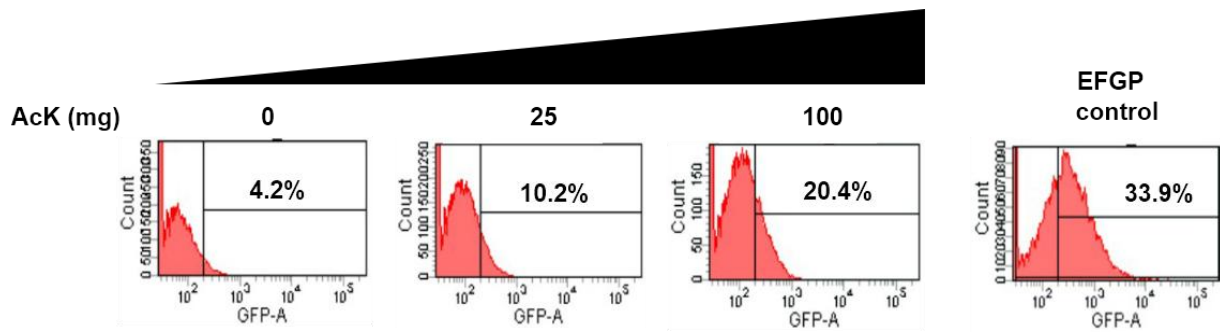

**Supplementary Figure 12.** Flow cytometric analysis for acetylated GFP expression in liver cells. Indicated amount of AcK was IP-injected to AcK-GFPamber. Liver cells were dissociated by dispase and collagenase and analyzed by flow cytometry. Upon addition of AcK, a dose-dependent fluorescence increase was observed. EGFP-expressing mouse strain was used as a control.

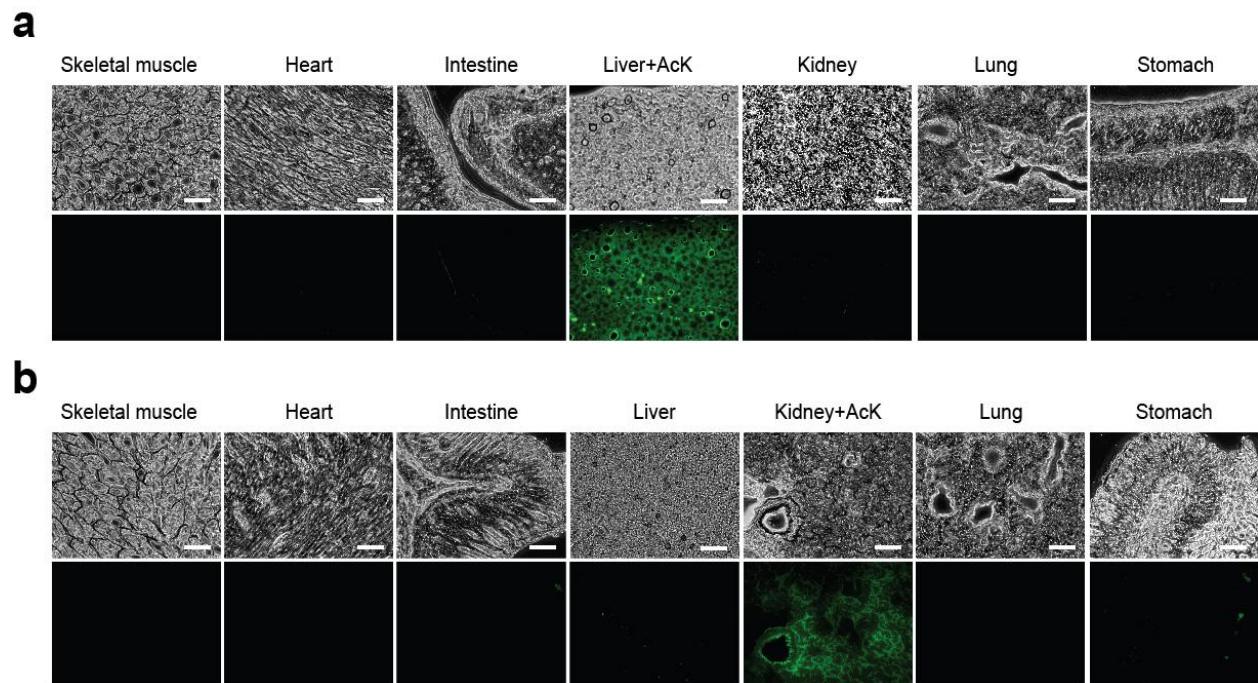

**Supplementary Figure 13.** Tissue specific expression of acetylated GFPuv. Tissues were collected after direct injection of AcK to target tissues and analyzed by fluorescence microscopy. Acetylated GFPuv was observed in liver (a) or kidney (b) only when AcK was directly delivered to the corresponding tissues. Scale bar, 200 $\mu$ m.

**Supplementary Table 1.** Tryptic digestion of GFPuv with a C-terminal FLAG-tag. The peptide with the modification site (Y39) is indicated in bold

| Residues     | Peptide sequence                            | Expected mass [M+H] <sup>+</sup> |
|--------------|---------------------------------------------|----------------------------------|
| 1-4          | MESK                                        | 494.2                            |
| 5-27         | GEELFTGVVPILVELDGDVN GHK                    | 2437.3                           |
| <b>28-42</b> | <b>FSVSGEGEGDATY GK</b>                     | <b>1503.7</b>                    |
| 43-46        | LTLK                                        | 474.3                            |
| 47-53        | FICTTGK                                     | 769.4                            |
| 54-74        | LPVPWPTLVTTFSYGVQCFS R                      | 2398.2                           |
| 75-80        | YPDHMK                                      | 790.4                            |
| 81-81        | R                                           | 175.1                            |
| 82-86        | HDFFK                                       | 693.3                            |
| 87-97        | SAMPEGYVQER                                 | 1266.6                           |
| 98-102       | TISFK                                       | 595.3                            |
| 103-108      | DDGNYK                                      | 711.3                            |
| 109-110      | TR                                          | 276.2                            |
| 111-114      | AEVK                                        | 446.3                            |
| 115-123      | FEGDTLVNR                                   | 1050.5                           |
| 124-127      | IELK                                        | 502.3                            |
| 128-132      | GIDFK                                       | 579.3                            |
| 133-141      | EDGNILGHK                                   | 982.5                            |
| 142-157      | LEYNYNSHNVYITADK                            | 1943.9                           |
| 158-159      | QK                                          | 275.2                            |
| 160-163      | NGIK                                        | 431.3                            |
| 164-167      | ANFK                                        | 479.3                            |
| 168-169      | IR                                          | 288.2                            |
| 170-210      | HNIEDGSVQLADHYQQNTPI GDGPVLLPDNHYLSTQSALS K | 4472.2                           |
| 211-215      | DPNEK                                       | 602.3                            |
| 216-216      | R                                           | 175.1                            |
| 217-239      | DHMLLEFVTAAGITHGMDE LYK                     | 2590.3                           |
| 240-242      | DYK                                         | 425.2                            |
| 243-247      | DDDDK                                       | 607.2                            |



**Supplementary Table 2.** Peptide fragment carrying the modification site (position 39) of wild type GFPuv or UAA-carrying GFPuv after trypsin digestion. Expected and observed mass of each tryptic peptide are shown.

| GFP         | Tryptic peptide<br>(170-210) | Mass [M+H] <sup>+</sup> , m/z |          |
|-------------|------------------------------|-------------------------------|----------|
|             |                              | Expected                      | Observed |
| GFP wt      | FSVSGEGEGDATY <b>G</b> K     | 1503.7                        | 1503.7   |
| GFP-39AcK   | FSVSGEGEGDAT <b>AcK</b> GK   | 1510.7                        | 1510.9   |
| GFP-39tfAcK | FSVSGEGEGDAT <b>tfAcK</b> GK | 1564.7                        | 1564.6   |
| GFP-39BrF   | FSVSGEGEGDAT <b>BrF</b> GK   | 1565.6                        | 1565.8   |
